# Supplementary material for: Poly(anhydride) nanoparticles act as effective adjuvants to elicit a persistent immune response
Source: Royal Society of Chemistry journal article supplement (doi:10.1039/c7ra11891k), 2017-01-01
Supplement: c7ra11891k1.pdf [file c7ra11891k1.pdf]

## Electronic Supplementary Information

### Poly(anhydride) nanoparticles act as the effective adjuvants to elicit persistent immune response

Caixia Liu<sup>‡a</sup>, Qiuxai Shen<sup>‡a</sup>, Wenwen Zheng<sup>a</sup>, Yao Lv<sup>a</sup>, Xinyu Chen<sup>a</sup>,  
Xiaoheng Li<sup>a</sup>, Qiqi Zhu<sup>a</sup>, Xiaoling Guo<sup>a</sup>, Renshan Ge<sup>\*a</sup> and Chao Li<sup>\*a</sup>

<sup>a</sup>. The Second Affiliated Hospital and Yuying Children's Hospital of Wenzhou  
Medical University, 109 Xueyuan West Road, Wenzhou 325027, P. R. China. E-mail:  
dishboy@163.com; r\_ge@yahoo.com.

<sup>‡</sup>These authors contributed equally to this work.

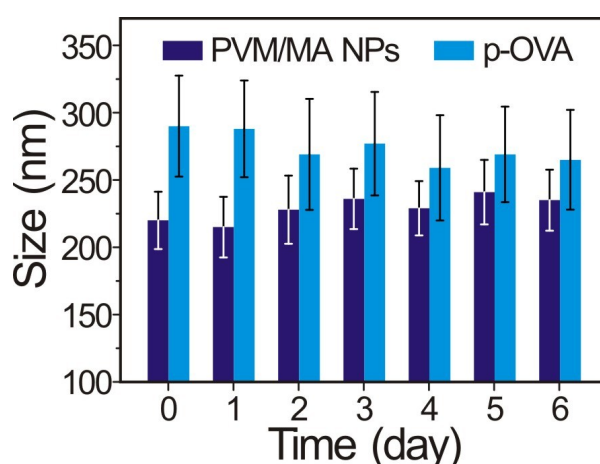

**Fig. S1** The size distribution stability of PVM/MA NPs and p-OVA. The PVMMA NPs and p-OVA nanoparticles were resuspended in PBS (pH: 7.4) at room temperature, the particle size distribution were measured every day in the following week. The data showed as mean  $\pm$  SD (n = 3).

**Table S1.** Primer sequences for RT-PCR (5' to 3')

| Target mRNA   | Forward                | Reverse               |
|---------------|------------------------|-----------------------|
| IFN- $\gamma$ | CCTTTGGACCCTCTGACTTGA  | GATGCAGTGTGTAGCGTTCAT |
| IL-17A        | CTCCAGAAGGCCCTCAGACTAC | GGGTCTTCATTGCGGTGG    |
| TNF- $\alpha$ | TGAGGTCAATCTGCCCAAGT   | TGGACCCTGAGCCATAATCC  |
| IL-10         | GAAGACCCTCAGGATGCGG    | CCTGCTCCACTGCCTTGCT   |
| IL-6          | GGAGCCACCAAGAACGATA    | ACCAGCATCAGTCCCAAGAA  |
| GAPDH         | TGTGTCCGTGGATCTGA      | TTGCTGTTGAAGTCGCAGGAG |
